# Supplementary material
Source: PubMed Central journal article supplement (PMC2788849)
Supplement: supp_M109.037929_jbc.M109.037929-1.pdf [file supp_M109.037929_jbc.M109.037929-1.pdf]

## Supplementary Material and Methods

### siRNA sequences :

The oligonucleotides corresponding to the sense-strand sequences of siRNA were: Human specific hnRNP U-siRNA: r(AAAGACCACGAGAAGAUGCAUG)dTdT ; shared human/mouse hnRNP U-siRNA r(GAGGUGGAAUGCCCAACAG) dTdT ; Mouse-specific hnRNP U-siRNA r(CAGUGUCUUGGCAAGUUU) dTdT and control, irrelevant siRNA (Qiagen).

### Primers sequences :

The qRT-PCR primer sequences were as follows: hnRNP U 5'-AACAGAGGTGGTGGCCATAG-3' and 5'-GTAACCTACCACGGCCAGGAA-3' and 5'-GGAAGTACGGCCTGAGAGGT-3'; HP1 $\alpha$  5'-CTAGACAGGCGCGTGGTTAAG- and 5'-GCTCAGGGCAATCCAAGTTTTT-3' ; and GAPDH : 5'-GGACCTGACCTGCCGTCTAGAA-3' and 5'-GGTGTCTGCTGTTGAAGTCAGAG-3'

### Antibodies :

Western-blot : Mouse anti-hnRNP U (sc-32315; Santa Cruz Biotechnology) ; Mouse anti-HP1 $\alpha$  (2HP-2G9-AS ; Euromedex) ; rat anti-HA (cat# 1867423, Roche) ; anti-Suv39h1 (07-550, Upstate) ;  $\beta$  tubulin (T5202, Sigma) ; goat anti-DNMT3A (sc-10231, Tebu-Bio) ; rabbit anti-HP1 $\alpha$  (C7F11, Cell Signaling).

| HP1 $\alpha$ peptides S | HP1 $\alpha$ peptides C | hnRNP U peptides S      | hnRNP U C peptides C |
|-------------------------|-------------------------|-------------------------|----------------------|
| DTDEADLVLAKE            | REQSNDIAR               | FIEIAAR                 | DIDIHEVR             |
| SNFSNSADDIK             | DTDEADLVLAKE            | DIDIHEVR                | LSASSLTMESFAFLWAGG   |
| KSNFSNSADDIK            | SNFSNSADDIK             | YNILGTNTIMDK            |                      |
| WKDTDEADLVLAKE          | KSNFSNSADDIK            | LLEQYKEESKK             | NFILDQTNVSAAAQR      |
| LTWHAYPEDAENK           | WKDTDEADLVLAKE          | NFILDQTNVSAAAQR         | YNILGTNTIMDK         |
| GFSEEHNTWEPEK           | LTWHAYPEDAENK           | SSGPTSLFAVTVAPPGAR      |                      |
| LTWHAYPEDAENKEK         | IIGATDSCGDLMLMK         | EKPYPFPIPEEYTFIQNVPLEDR |                      |
| TADSSSSSEDEEEYVVEK      | LTWHAYPEDAENKEK         |                         |                      |
| RTADSSSSSEDEEEYVVEK     | TADSSSSSEDEEEYVVEK      |                         |                      |
| LTWHAYPEDAENKEKETAK     | RTADSSSSSEDEEEYVVEK     |                         |                      |
| K                       | LTWHAYPEDAENKEKETAK     |                         |                      |
|                         | LTWHAYPEDAENKEKETAK     |                         |                      |
|                         | S                       |                         |                      |

**Table S1 :** Mass spectrometry identified peptides for HP1 and its interacting partner hnRNP U in nuclear soluble (S) and chromatinian fractions (C).

|                           | scr/Gal4DBD | si U1/Gal4DBD | scr/Gal4HP1 |
|---------------------------|-------------|---------------|-------------|
| <i>Luciferase/Renilla</i> | 0,0063      | 0,0061        | 0,0009      |
|                           | scr/Gal4DBD | si U2/Gal4DBD | scr/Gal4HP1 |
| <i>Luciferase/Renilla</i> | 0,03        | 0,029         | 0,008       |

**Table S2:** *Luciferase/Renilla* ratios of two representative experiments are shown.

A

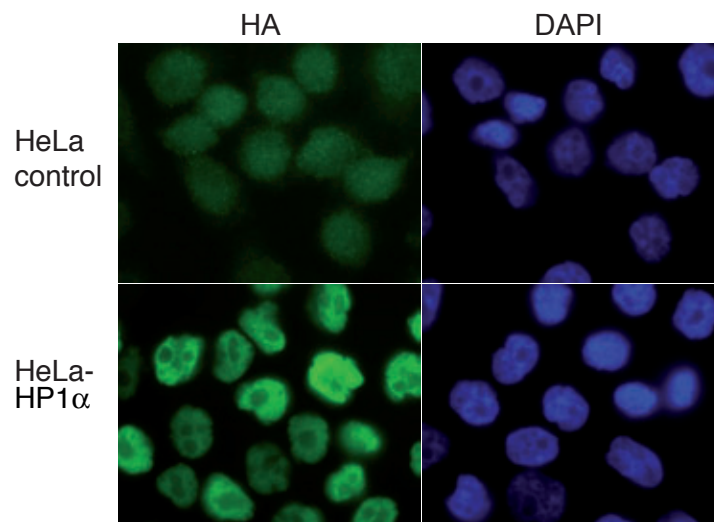

B

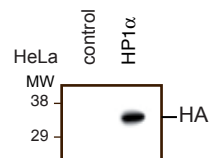

Figure S1, Ameyar-Zazoua et al.

Figure S1: Flag-HA tagged-HP1 $\alpha$ -localizes in the nucleus. (A) Control HeLa cells (upper panel) or HeLa cells expressing Flag-HA-HP1 $\alpha$  (lower panel) were subjected to immunofluorescence using anti-HA antibody. Cells were counter-stained with DAPI. (B) HeLa cells stably expressing human HP1 $\alpha$  or control HeLa cells were labelled with anti-HA antibody and analyzed by western blotting

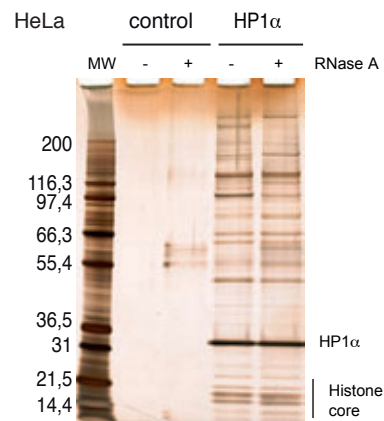

Figure S2, Ameyar-Zazoua et al.

Figure S2: Effects of RNase A treatment on nuclear soluble HP1 $\alpha$ -complex. Flag immunoprecipitates from HeLa cells expressing HP1 $\alpha$ -tagged protein or from control cells were treated, or not, with RNase A prior to incubation with HA-agarose beads. Eluates were run on 4-12% SDS PAGE and silver stained. Molecular masses of protein markers are indicated on the left.

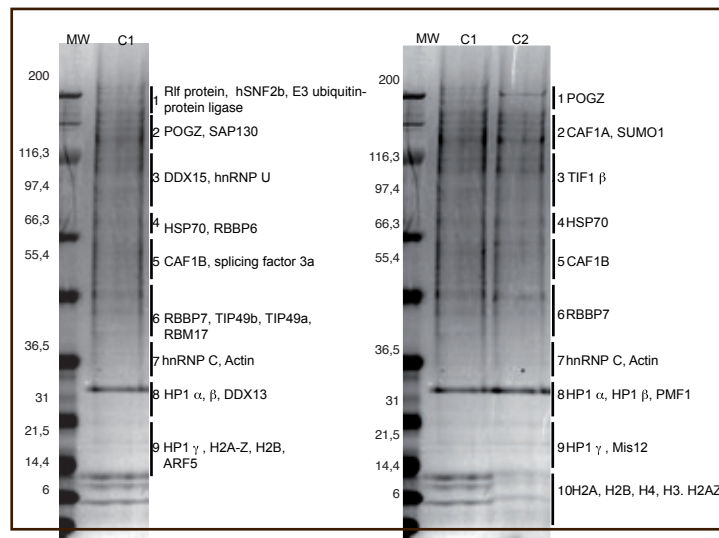

Figure S3, Ameyar-Zazoua et al.

Figure S3: hnRNP U co-fractionate with RNA binding proteins in the insoluble HP1  $\alpha$ -complex. The insoluble HP1  $\alpha$  complex was fractionated on glycerol gradients and fractions presenting similar profiles (as visualized on silver stain) were pooled and analyzed by MS. hnRNP U was found specifically in the fraction C1 (compare with C2). C1 corresponds to fractions ranging between 33 to 37% glycerol. C2 corresponds to fractions ranging between 27 to 31% glycerol.

A

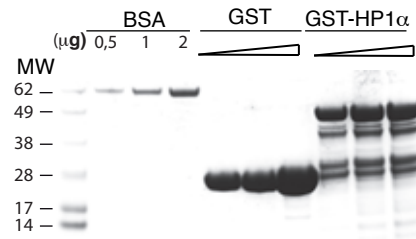

B

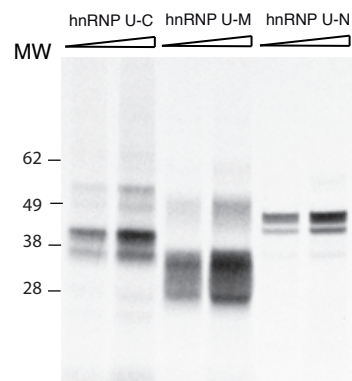

Figure S4, Ameyar-Zazoua et al.

Figure S4: Control of protein amounts in the GST pull-down experiments shown on Figures 2C. (A) Serial dilutions of recombinant proteins, GST and GST-HP1 $\alpha$  were revealed by coomassie staining. (B) Serial dilutions of recombinant hnRNP U proteins were revealed by autoradiography.
